# Supplementary material for: Mineral particles stimulate innate immunity through neutrophil extracellular traps containing HMGB1
Source: PubMed Central journal article supplement (PMC5709501; doi:10.1038/s41598-017-16778-4), 2017-11-30
Supplement: 41598_2017_16778_MOESM1_ESM.pdf [file 41598_2017_16778_MOESM1_ESM.pdf]

# **Mineral particles stimulate innate immunity through neutrophil extracellular traps containing HMGB1**

Hsin-Hsin Peng, Yu-Ju Liu, David M. Ojcius, Chiou-Mei Lee, Ren-Hao Chen, Pei-Rong Huang, Jan Martel & John D. Young

## Supplementary Information

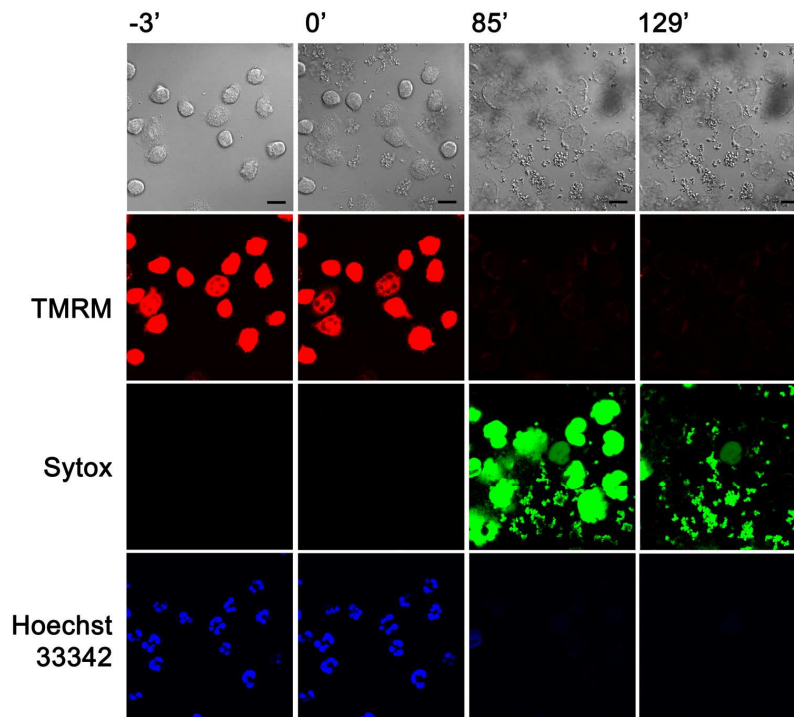

**Figure S1. Mineral particles induce loss of mitochondrial potential in neutrophils.** Neutrophils were exposed to mineral particles and an indicator of mitochondrial membrane potential (tetramethylrhodamine methyl ester, TMRM; red). Nuclear DNA was stained blue (Hoechst 33342), while NET DNA was stained green (Sytox). Data are representative of three independent experiments. Scale bar, 10  $\mu\text{m}$ .

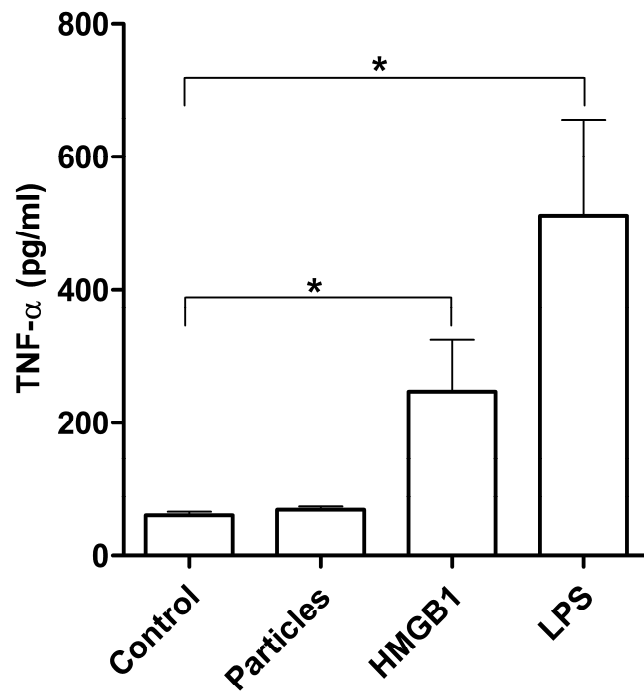

**Figure S2. Priming THP-1 macrophages with PMA does not facilitate TNF- $\alpha$  secretion upon stimulation with mineral particles.** THP-1 cells previously primed with PMA were cultured with mineralo-organic particles (“Particles”), or recombinant HMGB1 (“HMGB1”) or LPS (“LPS”) as positive control. Data are shown as means  $\pm$  SEM and the results of at least three independent experiments. \* $p < 0.05$ , vs. untreated neutrophils.

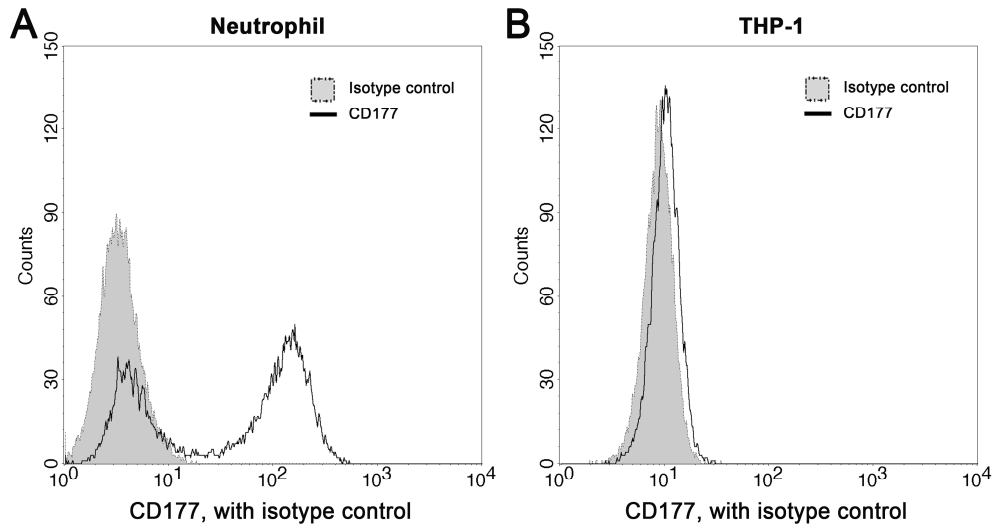

**Figure S3. Flow cytometry analysis of isolated neutrophils and cultured macrophages.** The isolated neutrophil population (A) stained positive for CD177, whereas cultured THP-1 cells (B) did not. A portion of neutrophils remained CD177 negative; the CD177-negative population is considered part of the neutrophil profile of CD77 expression.

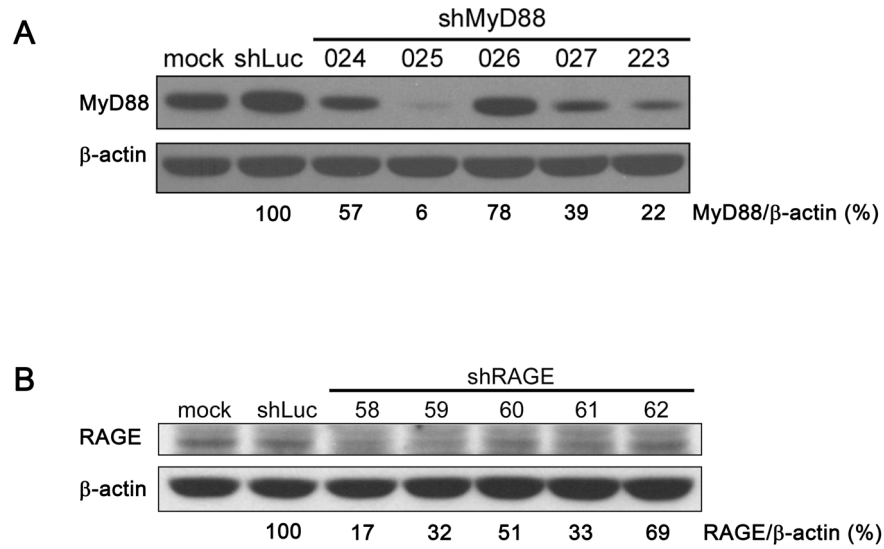

**Figure S4. Downregulation of MyD88 and RAGE by stable shRNA expression in THP-1 cells.** THP-1 cell clones stably expressing shRNA targeting either MyD88 (A) or RAGE (B) were generated, and expression of the target proteins was assessed using Western blotting. Mock: mock-transduced cells; shLuc: THP-1 cells expressing shRNA directed against luciferase as a control; 024, 025, 026, 027, and 233: MyD88-targeting shRNA clone TRCN0000008024, TRCN0000008025, TRCN0000008026, TRCN0000008027 and TRCN0000011223, respectively; 58, 59, 60, 61, and 62: RAGE-targeting shRNA clone TRCN0000062658, TRCN0000062659, TRCN0000062660, TRCN0000062661 and TRCN0000062662, respectively.

**Video S1. Live cell imaging of neutrophil response to mineral particles**

Microscopy images were taken every 3 min. The playback speed is 5 frames/sec. Blue, DAPI; green, Sytox.

**Video S2. Depiction of 3D-reconstruction of NET-macrophage interactions**

The movie was generated by Z-stacking with section thickness = 1  $\mu\text{m}$ . Blue, DAPI; green, Sytox; red, THP-1.
